# Supplementary material for: Efficacy and acceptability of blue-wavelength light therapy for post-TBI behavioral symptoms: A systematic review and meta-analysis of randomized controlled trials
Source: PubMed Central journal article supplement (PMC9536631; doi:10.1371/journal.pone.0274025), 2022-10-06

## SUPPLEMENTARY MATERIALS

### **Efficacy and Acceptability of Blue-Wavelength Light Therapy for Common Behavioral Symptoms After Traumatic Brain Injury: A Systematic Review and Meta-Analysis of Randomized Controlled Trials**

**Karan Srisurapanont<sup>1</sup>; Yanisa Samakarna<sup>1</sup>; Boonyasit Kamklong<sup>1</sup>; Phichayakan Siratrairat<sup>1</sup>; Arina Bumiputra<sup>1</sup>; Montita Jaikwang<sup>1</sup>; Manit Srisurapanont, M.D.<sup>2\*</sup>**

1 Faculty of Medicine, Chiang Mai University, Chiang Mai, Thailand

2 Department of Psychiatry, Faculty of Medicine, Chiang Mai University, Chiang Mai, Thailand

#### **Correspondence to:**

Manit Srisurapanont, MD  
Department of Psychiatry  
Faculty of Medicine, Chiang Mai University  
Muang, Chiang Mai 50200 THAILAND  
Email: manit.s@cmu.ac.th

#### **List of abbreviations:**

BWLT = Blue-wavelength light therapy  
CI = Confidence interval  
IV = Inverse variance  
LED = Light emitting diode  
SMD = Standardized mean difference  
TBI = Traumatic brain injury

## CONTENTS

|                                                                              | Page |
|------------------------------------------------------------------------------|------|
| SUPPLEMENTARY TABLES                                                         |      |
| S1 Table: Search Strategy and Results (April 13, 2022)                       | 1    |
| S2 Table: Excluded Trials with Reasons                                       | 5    |
|                                                                              |      |
| SUPPLEMENTARY FIGURES (SFigures)                                             |      |
| S1 Fig.: Forest plots comparing the dropout rates                            | 6    |
| S2 Fig.: Subgroup analysis of five outcomes                                  | 7    |
| S3 Fig.: Sensitivity analysis of five outcomes                               | 9    |
| S4 Fig.: Funnel plot showing the treatment-effect estimates of dropout rates | 11   |

**SUPPLEMENTARY TABLES**

**S1 Table: Search Strategies and Results (April 13, 2022)**

**A. PUBMED (n = 42)**

| Search number | Query                   | Search Details                                                                                                                                                                                                                                                                                                                                                                                                                                                                                                                                                                                                                                                                                                                                                                                                                                                                                                                                                                                                                                                                                                                                                                                                                                                                                                                                                                                                                                                                                                                                                                                                                                                                                                                                                                                                                                                                                                                       | Results |
|---------------|-------------------------|--------------------------------------------------------------------------------------------------------------------------------------------------------------------------------------------------------------------------------------------------------------------------------------------------------------------------------------------------------------------------------------------------------------------------------------------------------------------------------------------------------------------------------------------------------------------------------------------------------------------------------------------------------------------------------------------------------------------------------------------------------------------------------------------------------------------------------------------------------------------------------------------------------------------------------------------------------------------------------------------------------------------------------------------------------------------------------------------------------------------------------------------------------------------------------------------------------------------------------------------------------------------------------------------------------------------------------------------------------------------------------------------------------------------------------------------------------------------------------------------------------------------------------------------------------------------------------------------------------------------------------------------------------------------------------------------------------------------------------------------------------------------------------------------------------------------------------------------------------------------------------------------------------------------------------------|---------|
| 5             | #1 AND #2 AND #3 AND #4 | (“brain injuries”[MeSH Terms] OR (“brain”[All Fields] AND “injuries”[All Fields]) OR “brain injuries”[All Fields] OR (“brain”[All Fields] AND “injury”[All Fields]) OR “brain injury”[All Fields] OR (“craniocerebral trauma”[MeSH Terms] OR (“craniocerebral”[All Fields] AND “trauma”[All Fields]) OR “craniocerebral trauma”[All Fields] OR (“head”[All Fields] AND “injury”[All Fields]) OR “head injury”[All Fields])) AND (“phototherapy”[MeSH Terms] OR “phototherapy”[All Fields] OR (“light”[All Fields] AND “therapy”[All Fields]) OR “light therapy”[All Fields] OR (“light”[MeSH Terms] OR “light”[All Fields] OR “lighted”[All Fields] OR “lights”[All Fields] OR “lighting”[MeSH Terms] OR “lighting”[All Fields] OR “lightings”[All Fields] OR “lightness”[All Fields] OR “lightnesses”[All Fields]) AND (“therapeutics”[MeSH Terms] OR “therapeutics”[All Fields] OR “treatments”[All Fields] OR “therapy”[MeSH Subheading] OR “therapy”[All Fields] OR “treatment”[All Fields] OR “treatment s”[All Fields])) OR (“phototherapy”[MeSH Terms] OR “phototherapy”[All Fields] OR “phototherapies”[All Fields])) AND (“sleep”[MeSH Terms] OR “sleep”[All Fields] OR “sleeping”[All Fields] OR “sleeps”[All Fields] OR “sleep s”[All Fields] OR (“affect”[MeSH Terms] OR “affect”[All Fields] OR “mood”[All Fields]) OR “depress*”[All Fields] OR (“fatiguability”[All Fields] OR “fatiguable”[All Fields] OR “fatigue”[MeSH Terms] OR “fatigue”[All Fields] OR “fatigued”[All Fields] OR “fatigues”[All Fields] OR “fatiguing”[All Fields] OR “fatigueability”[All Fields]) OR (“exhausted”[All Fields] OR “exhausting”[All Fields] OR “exhaustion”[All Fields] OR “exhaustions”[All Fields] OR “exhaustive”[All Fields] OR “exhaustively”[All Fields]) OR (“fatigue”[MeSH Terms] OR “fatigue”[All Fields] OR “tiredness”[All Fields]) OR (“lethargy”[MeSH Terms] OR “lethargy”[All Fields])) AND “random*”[All Fields] | 42      |

|   |                                                                             |                                                                                                                                                                                                                                                                                                                                                                                                                                                                                                                                                                                                                                                                                                                                                              |           |
|---|-----------------------------------------------------------------------------|--------------------------------------------------------------------------------------------------------------------------------------------------------------------------------------------------------------------------------------------------------------------------------------------------------------------------------------------------------------------------------------------------------------------------------------------------------------------------------------------------------------------------------------------------------------------------------------------------------------------------------------------------------------------------------------------------------------------------------------------------------------|-----------|
| 4 | random*                                                                     | “random*”[All Fields]                                                                                                                                                                                                                                                                                                                                                                                                                                                                                                                                                                                                                                                                                                                                        | 1,553,012 |
| 3 | sleep OR mood OR depress* OR fatigue OR exhaustion OR tiredness OR lethargy | “sleep”[MeSH Terms] OR “sleep”[All Fields] OR “sleeping”[All Fields] OR “sleeps”[All Fields] OR “sleep s”[All Fields] OR “affect”[MeSH Terms] OR “affect”[All Fields] OR “mood”[All Fields] OR “depress*”[All Fields] OR “fatiguability”[All Fields] OR “fatiguable”[All Fields] OR “fatigue”[MeSH Terms] OR “fatigue”[All Fields] OR “fatigued”[All Fields] OR “fatigues”[All Fields] OR “fatiguing”[All Fields] OR “fatigueability”[All Fields] OR “exhausted”[All Fields] OR “exhausting”[All Fields] OR “exhaustion”[All Fields] OR “exhaustions”[All Fields] OR “exhaustive”[All Fields] OR “exhaustively”[All Fields] OR “fatigue”[MeSH Terms] OR “fatigue”[All Fields] OR “tiredness”[All Fields] OR “lethargy”[MeSH Terms] OR “lethargy”[All Fields] | 1,755,558 |
| 2 | (light therapy) OR (light treatment) OR phototherapy                        | “phototherapy”[MeSH Terms] OR “phototherapy”[All Fields] OR (“light”[All Fields] AND “therapy”[All Fields]) OR “light therapy”[All Fields] OR ((“light”[MeSH Terms] OR “light”[All Fields] OR “lighted”[All Fields] OR “lights”[All Fields] OR “lighting”[MeSH Terms] OR “lighting”[All Fields] OR “lightings”[All Fields] OR “lightness”[All Fields] OR “lightnesses”[All Fields]) AND (“therapeutics”[MeSH Terms] OR “therapeutics”[All Fields] OR “treatments”[All Fields] OR “therapy”[MeSH Subheading] OR “therapy”[All Fields] OR “treatment”[All Fields] OR “treatment s”[All Fields])) OR (“phototherapy”[MeSH Terms] OR “phototherapy”[All Fields] OR “phototherapies”[All Fields])                                                                 | 280,760   |
| 1 | (brain injury) OR (head injury)                                             | “brain injuries”[MeSH Terms] OR (“brain”[All Fields] AND “injuries”[All Fields]) OR “brain injuries”[All Fields] OR (“brain”[All Fields] AND “injury”[All Fields]) OR “brain injury”[All Fields] OR (“craniocerebral trauma”[MeSH Terms] OR (“craniocerebral”[All Fields] AND “trauma”[All Fields]) OR “craniocerebral trauma”[All Fields] OR (“head”[All Fields] AND “injury”[All Fields]) OR “head injury”[All Fields])                                                                                                                                                                                                                                                                                                                                    | 289,727   |

**B. EMBASE (n = 93)**

| No.<br>Query                                                                                                            | Results   |
|-------------------------------------------------------------------------------------------------------------------------|-----------|
|                                                                                                                         | 93        |
| <b>#5</b><br>#1 AND #2 AND #3 AND #4                                                                                    | 2,023,880 |
| <b>#4</b><br>random*                                                                                                    | 1,597,244 |
| <b>#3</b><br>sleep OR mood OR depress* OR fatigue OR exhaustion OR tiredness OR lethargy                                | 244,757   |
| <b>#2</b><br>light AND therapy OR (light AND treatment) OR phototherapy                                                 | 592,766   |
| <b>#1</b><br>(‘brain’/exp OR brain) AND (‘injury’/exp OR injury) OR ((‘head’/exp OR head) AND (‘injury’/exp OR injury)) |           |

**C. CINAHL (n = 13)**

| #  | Query                                                                             | Limiters/Expanders                                                               | Last Run Via                                                                                              | Results |
|----|-----------------------------------------------------------------------------------|----------------------------------------------------------------------------------|-----------------------------------------------------------------------------------------------------------|---------|
| S5 | S1 AND S2 AND S3 AND S4                                                           | Expanders – Apply equivalent subjects<br>Search modes – Find all my search terms | Interface – EBSCOhost Research Databases<br>Search Screen – Advanced Search<br>Database – CINAHL Complete | 13      |
| S4 | random*                                                                           | Expanders – Apply equivalent subjects<br>Search modes – Find all my search terms | Interface – EBSCOhost Research Databases<br>Search Screen – Advanced Search<br>Database – CINAHL Complete | 479,581 |
| S3 | sleep OR mood OR depress* OR<br>fatigue OR exhaustion OR tiredness<br>OR lethargy | Expanders – Apply equivalent subjects<br>Search modes – Find all my search terms | Interface – EBSCOhost Research Databases<br>Search Screen – Advanced Search<br>Database – CINAHL Complete | 359,732 |
| S2 | (light therapy) OR (light treatment)<br>OR phototherapy                           | Expanders – Apply equivalent subjects<br>Search modes – Find all my search terms | Interface – EBSCOhost Research Databases<br>Search Screen – Advanced Search<br>Database – CINAHL Complete | 23,855  |
| S1 | (brain injury) OR (head injury)                                                   | Expanders – Apply equivalent subjects<br>Search modes – Find all my search terms | Interface – EBSCOhost Research Databases<br>Search Screen – Advanced Search<br>Database – CINAHL Complete | 62,706  |

**D. COCHRANE CENTRAL REGISTER OF CONTROLLED TRIALS (n = 75)**

sleep OR mood OR (depress\*) OR (fatigue OR exhaustion OR tiredness OR lethargy ):ti,ab,kw AND (brain injury) OR (head injury):ti,ab,kw AND (light therapy) OR (light treatment) OR (phototherapy):ti,ab,kw (Word variations have been searched)

**S2 Table: Excluded Trials with Reasons**

| <b>Trials</b>                          | <b>Reason for exclusion</b>                                                                                  |
|----------------------------------------|--------------------------------------------------------------------------------------------------------------|
| <i>Participant mismatch</i>            |                                                                                                              |
| O'Brien, et al. 2017 <sup>1</sup>      | 13 participants with stroke and 3 participants with TBI                                                      |
| <i>Intervention mismatch</i>           |                                                                                                              |
| Bogdanova, et al. 2017 <sup>2</sup>    | Transcranial LED helmets and intranasal LED applicators                                                      |
| NCT01725750 <sup>3</sup>               | Full-spectrum bright light therapy                                                                           |
| <i>Non-controlled trials</i>           |                                                                                                              |
| Elliott, et al. 2019 <sup>4</sup>      | Single-arm intervention trial                                                                                |
| <i>Trial protocols without results</i> |                                                                                                              |
| NCT01175993 <sup>5</sup>               | Effects of Rapid-Resisted Exercise and Bright Light Therapy on Ambulatory Adults With Traumatic Brain Injury |
| NCT03578003 <sup>6</sup>               | Morning Bright Light to Improve Sleep Quality in Veterans                                                    |
| NCT03785600 <sup>7</sup>               | Improving Sleep in Veterans With TBI                                                                         |
| NCT03968874 <sup>8</sup>               | Improving Sleep, Sleep-related Outcomes, and Biomarkers in Veterans                                          |

*References*

1. O'Brien, K. *et al.* Randomized trial of light therapy for cognitive function during inpatient rehabilitation for acquired brain injury. *Archives of Physical Medicine and Rehabilitation* **98**, e173–e174 (2017).
2. Bogdanova, Y. *et al.* Transcranial LED treatment for cognitive dysfunction and sleep in chronic TBI: Randomized controlled pilot trial. *Archives of Physical Medicine and Rehabilitation* **98**, e122–e123 (2017).
3. NCT01725750. Treatment of Post-Traumatic Brain Injury (Post-TBI) Fatigue With Light Therapy. <https://clinicaltrials.gov/show/NCT01725750> (2012).
4. Elliott, J. E., Balba, N. M., McBride, A. A., Thomas, S. V. & Lim, M. M. Morning bright light improves insomnia, mood, and pain in veterans with TBI and PTSD. *Sleep* **42**, A349 (2019).
5. NCT01175993. Effects of Rapid-Resisted Exercise and Bright Light Therapy on Ambulatory Adults With Traumatic Brain Injury. <https://clinicaltrials.gov/show/NCT01175993> (2010).
6. NCT03578003. Morning Bright Light to Improve Sleep Quality in Veterans. <https://clinicaltrials.gov/show/NCT03578003> (2018).
7. NCT03785600. Improving Sleep in Veterans With TBI. <https://clinicaltrials.gov/show/NCT03785600> (2018).
8. NCT03968874. Improving Sleep, Sleep-related Outcomes, and Biomarkers in Veterans. <https://clinicaltrials.gov/show/NCT03968874> (2019).

## SUPPLEMENTARY FIGURES

**S1 Fig.:** Forest plots comparing the dropout rates [blue-wavelength light therapy (BWLTL) vs. control interventions (amber, red, or no light therapy)].

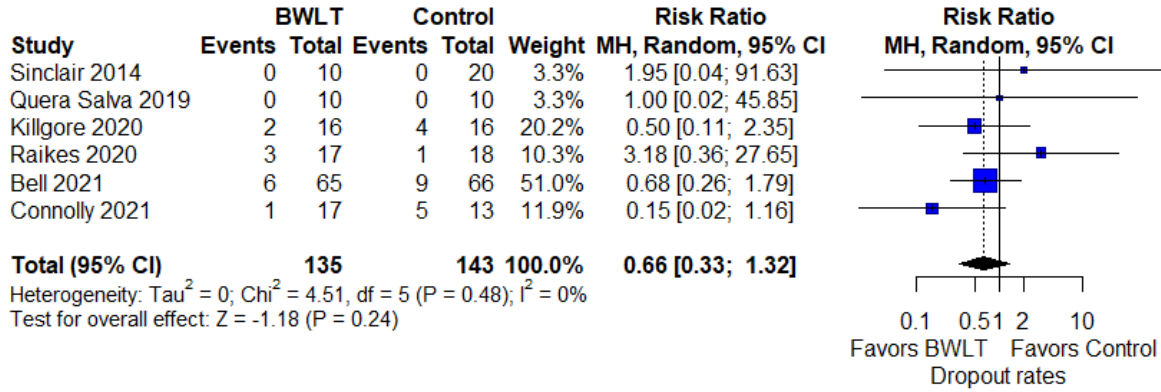

S2 Fig.: Subgroup analysis of five outcomes - based on the severity of traumatic brain injury.

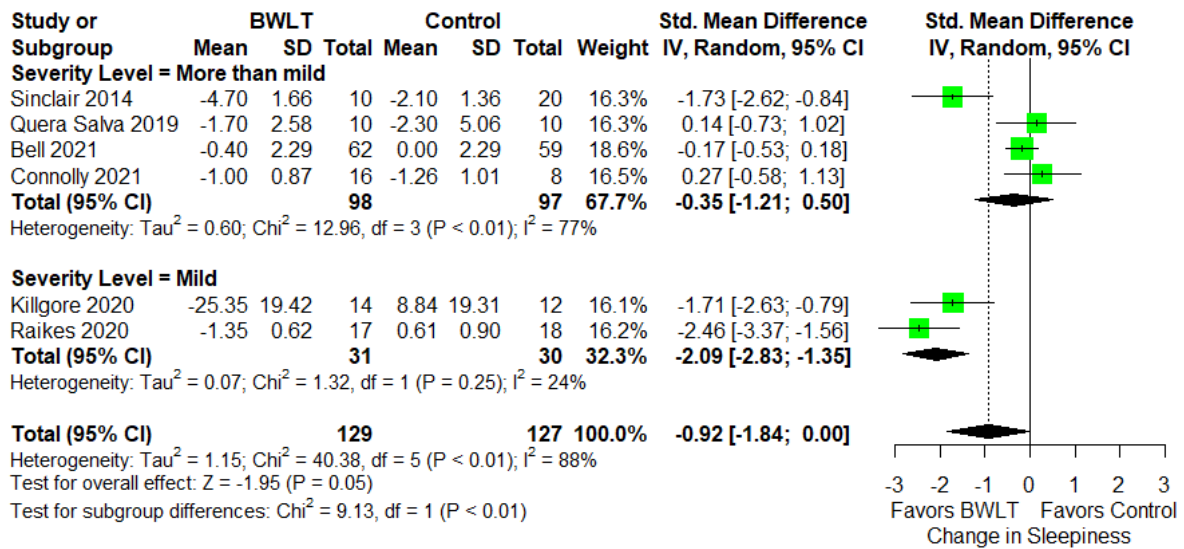

A)

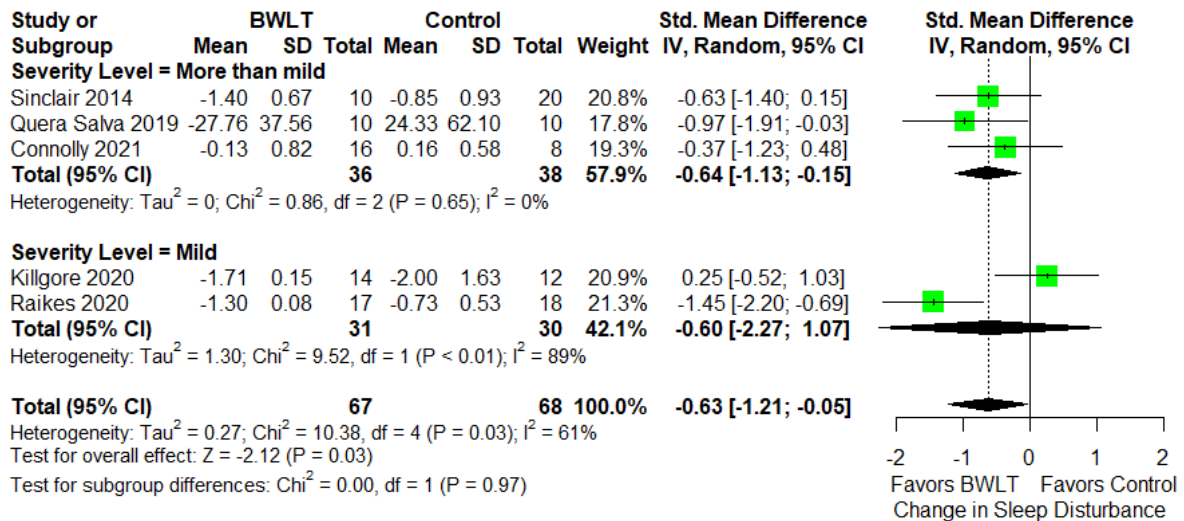

B)

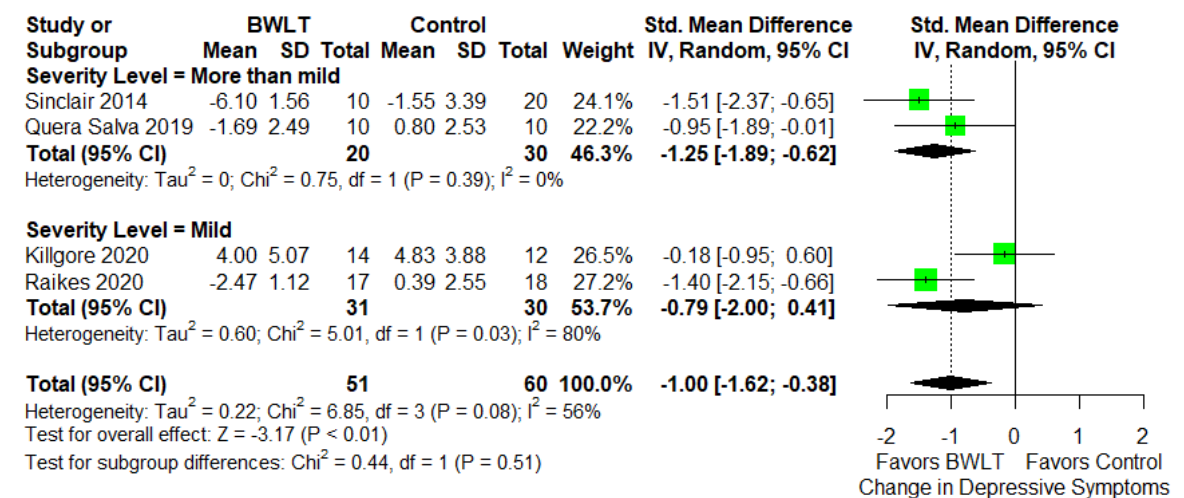

C)



| Study or Subgroup                      | BWL    |       | Control   |       | Weight | Std. Mean Difference IV, Random, 95% CI |
|----------------------------------------|--------|-------|-----------|-------|--------|-----------------------------------------|
|                                        | Mean   | SD    | Mean      | SD    |        |                                         |
| <b>Severity Level = More than mild</b> |        |       |           |       |        |                                         |
| Sinclair 2014                          | -1.30  | 0.38  | 10        | -0.15 | 0.24   | 20 23.0%                                |
| Quera Salva 2019                       | -1.18  | 1.43  | 10        | 0.29  | 1.17   | 10 24.8%                                |
| Bell 2021                              | -10.20 | 15.70 | 62        | -8.10 | 15.70  | 59 27.1%                                |
| Connolly 2021                          | -0.71  | 0.55  | 16        | -0.12 | 0.59   | 8 25.1%                                 |
| <b>Total (95% CI)</b>                  |        |       | <b>98</b> |       |        | <b>97 100.0%</b>                        |

Heterogeneity:  $\tau^2 = 2.16$ ;  $\chi^2 = 32.46$ ,  $df = 3$  ( $P < 0.01$ );  $I^2 = 91\%$

**Total (95% CI)** 98 97 100.0% -1.44 [-2.95; 0.08]

Heterogeneity:  $\tau^2 = 2.16$ ;  $\chi^2 = 32.46$ ,  $df = 3$  ( $P < 0.01$ );  $I^2 = 91\%$

Test for overall effect:  $Z = -1.86$  ( $P = 0.06$ )

Test for subgroup differences:  $\chi^2 = 0.00$ ,  $df = 0$  ( $P = NA$ )

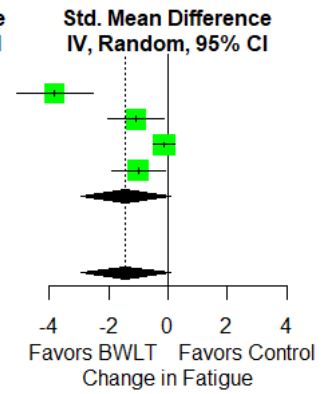

D)

| Study or Subgroup                      | BWL        |       | Control    |              | Weight | Risk Ratio MH, Random, 95% CI |
|----------------------------------------|------------|-------|------------|--------------|--------|-------------------------------|
|                                        | Events     | Total | Events     | Total        |        |                               |
| <b>Severity Level = More than mild</b> |            |       |            |              |        |                               |
| Sinclair 2014                          | 0          | 10    | 0          | 20           | 3.3%   | 1.95 [0.04; 91.63]            |
| Quera Salva 2019                       | 0          | 10    | 0          | 10           | 3.3%   | 1.00 [0.02; 45.85]            |
| Bell 2021                              | 6          | 65    | 9          | 66           | 51.0%  | 0.68 [0.26; 1.79]             |
| Connolly 2021                          | 1          | 17    | 5          | 13           | 11.9%  | 0.15 [0.02; 1.16]             |
| <b>Total (95% CI)</b>                  | <b>102</b> |       | <b>109</b> | <b>69.5%</b> |        | <b>0.56 [0.24; 1.30]</b>      |

Heterogeneity:  $\tau^2 = 0$ ;  $\chi^2 = 2.22$ ,  $df = 3$  ( $P = 0.53$ );  $I^2 = 0\%$

**Severity Level = Mild**

Killgore 2020 2 16 4 16 20.2% 0.50 [0.11; 2.35]

Raikes 2020 3 17 1 18 10.3% 3.18 [0.36; 27.65]

**Total (95% CI)** 33 34 30.5% 1.07 [0.18; 6.39]

Heterogeneity:  $\tau^2 = 0.79$ ;  $\chi^2 = 1.85$ ,  $df = 1$  ( $P = 0.17$ );  $I^2 = 46\%$

**Total (95% CI)** 135 143 100.0% 0.66 [0.33; 1.32]

Heterogeneity:  $\tau^2 = 0$ ;  $\chi^2 = 4.51$ ,  $df = 5$  ( $P = 0.48$ );  $I^2 = 0\%$

Test for overall effect:  $Z = -1.18$  ( $P = 0.24$ )

Test for subgroup differences:  $\chi^2 = 0.41$ ,  $df = 1$  ( $P = 0.52$ )

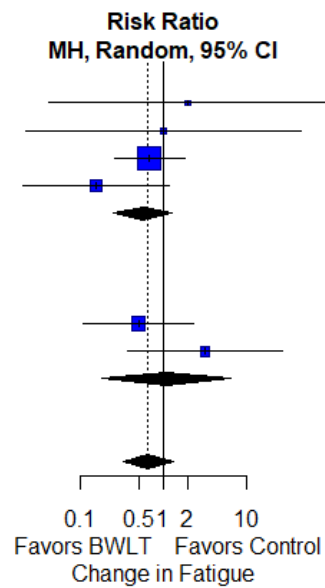

E)

**S3 Fig.:** Sensitivity analysis of five outcomes – excluding three trials with a high-risk of bias.

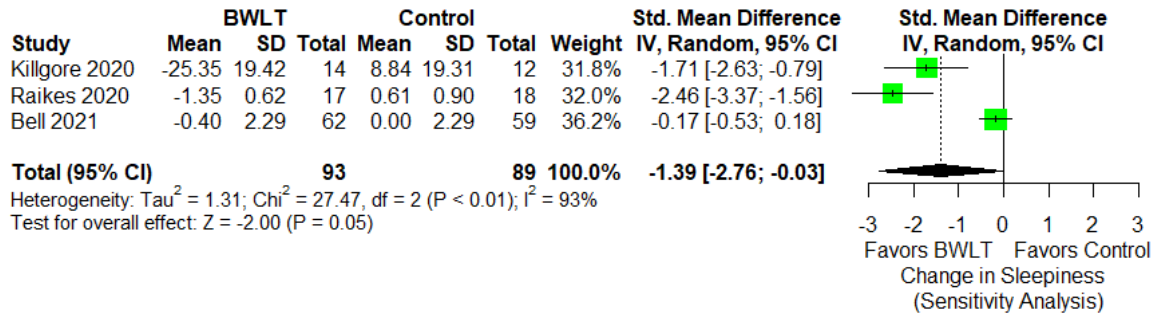

A)

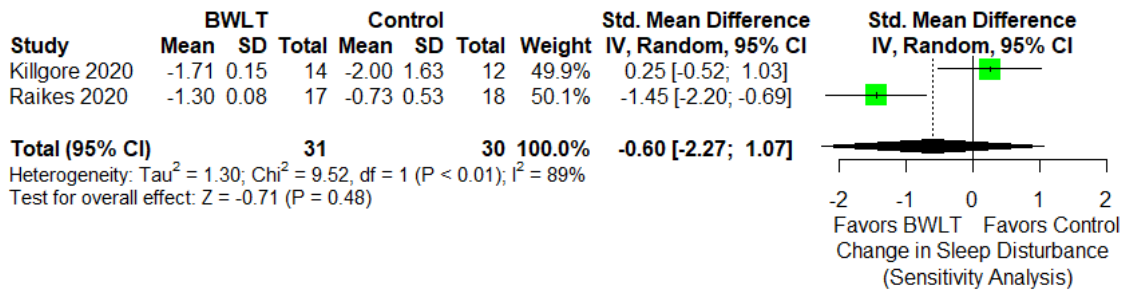

B)

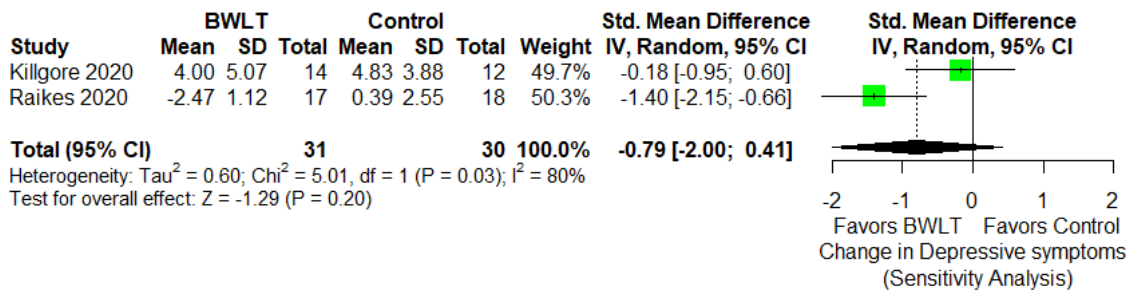

C)

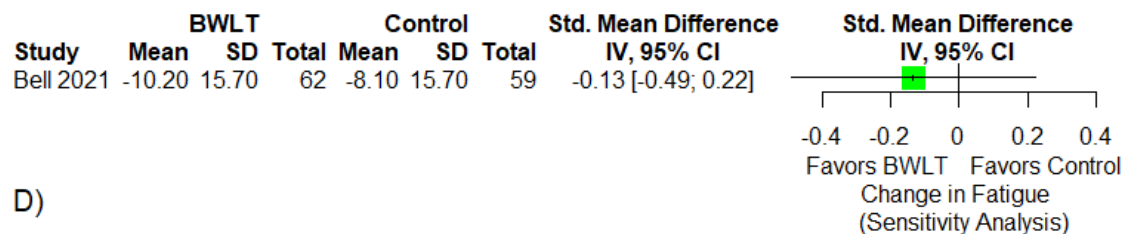

D)

| Study                 | BWL    |           | Control |            | Weight        | Risk Ratio               |
|-----------------------|--------|-----------|---------|------------|---------------|--------------------------|
|                       | Events | Total     | Events  | Total      |               | MH, Random, 95% CI       |
| Killgore 2020         | 2      | 16        | 4       | 16         | 24.7%         | 0.50 [0.11; 2.35]        |
| Raikes 2020           | 3      | 17        | 1       | 18         | 12.7%         | 3.18 [0.36; 27.65]       |
| Bell 2021             | 6      | 65        | 9       | 66         | 62.6%         | 0.68 [0.26; 1.79]        |
| <b>Total (95% CI)</b> |        | <b>98</b> |         | <b>100</b> | <b>100.0%</b> | <b>0.76 [0.35; 1.65]</b> |

Heterogeneity:  $\tau^2 < 0.01$ ;  $\text{Chi}^2 = 2.01$ ,  $\text{df} = 2$  ( $P = 0.37$ );  $I^2 = 1\%$   
 Test for overall effect:  $Z = -0.68$  ( $P = 0.49$ )

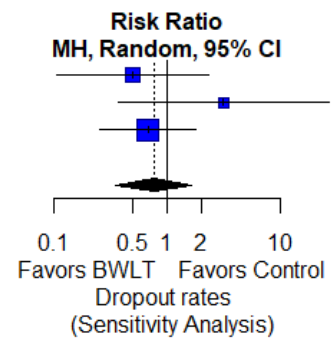

E)

**S4 Fig.:** Funnel plot showing the treatment-effect estimates of dropout rates.

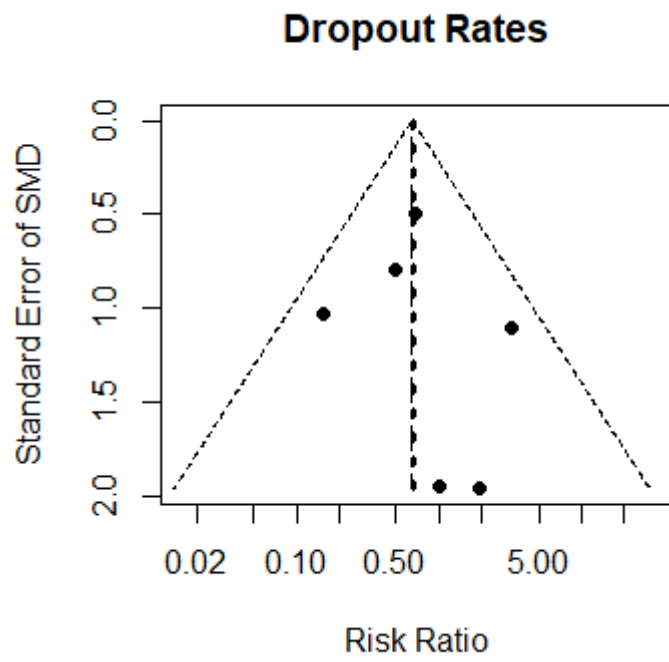

Supplement: pone.0274025.s002.pdf [file pone.0274025.s002.pdf]
